# Supplementary material
Source: publisher site journal article supplement (https://www.dovepress.com/article/333725)
Supplement: Supplementary file 1 [file get_supplementary_file.php]

Gene Name: CASP1, NLRP3 fusion, Length: 4329bp, Vector Name: pUC57, Codon Optimization: No
Start with: GCTAGC
Sequence: 
GCCACCATGGCCGACAAGGTCCTGAAGGAGAAGAGAAAGCTGTTTATCCGTTCCATGGGTGAAGGTACAATAAATGGCTTACTGGATGAATTATTACAGACAAGGGTGCTGAACAAGGAAGAGATGGAGAAAGTAAAACGTGAAAATGCTACAGTTATGGATAAGACCCGAGCTTTGATTGACTCCGTTATTCCGAAAGGGGCACAGGCATGCCAAATTTGCATCACATACATTTGTGAAGAAGACAGTTACCTGGCAGGGACGCTGGGACTCTCAGCAGCTCCTCAGGCAGTGCAGGACAACCCAGCTATGCCCACATCCTCAGGCTCAGAAGGGAATGTCAAGCTTTGCTCCCTAGAAGAAGCTCAAAGGATATGGAAACAAAAGTCGGCAGAGATTTATCCAATAATGGACAAGTCAAGCCGCACACGTCTTGCTCTCATTATCTGCAATGAAGAATTTGACAGTATTCCTAGAAGAACTGGAGCTGAGGTTGACATCACAGGCATGACAATGCTGCTACAAAATCTGGGGTACAGCGTAGATGTGAAAAAAAATCTCACTGCTTCGGACATGACTACAGAGCTGGAGGCATTTGCACACCGCCCAGAGCACAAGACCTCTGACAGCACGTTCCTGGTGTTCATGTCTCATGGTATTCGGGAAGGCATTTGTGGGAAGAAACACTCTGAGCAAGTCCCAGATATACTACAACTCAATGCAATCTTTAACATGTTGAATACCAAGAACTGCCCAAGTTTGAAGGACAAACCGAAGGTGATCATCATCCAGGCCTGCCGTGGTGACAGCCCTGGTGTGGTGTGGTTTAAAGATTCAGTAGGAGTTTCTGGAAACCTATCTTTACCAACTACAGAAGAGTTTGAGGATGATGCTATTAAGAAAGCCCACATAGAGAAGGATTTTATCGCTTTCTGCTCTTCCACACCAGATAATGTTTCTTGGAGACATCCCACAATGGGCTCTGTTTTTATTGGAAGACTCATTGAACATATGCAAGAATATGCCTGTTCCTGTGATGTGGAGGAAATTTTCCGCAAGGTTCGATTTTCATTTGAGCAGCCAGATGGTAGAGCGCAGATGCCCACCACTGAAAGAGTGACTTTGACAAGATGTTTCTACCTCTTCCCAGGACATGAGGGCAGAGGAAGTCTTCTAACATGCGGTGACGTGGAGGAGAATCCCGGCCCTATGGCAAGCACCCGCTGCAAGCTGGCCAGGTACCTGGAGGACCTGGAGGATGTGGACTTGAAGAAATTTAAGATGCACTTAGAGGACTATCCTCCCCAGAAGGGCTGCATCCCCCTCCCGAGGGGTCAGACAGAGAAGGCAGACCATGTGGATCTAGCCACGCTAATGATCGACTTCAATGGGGAGGAGAAGGCGTGGGCCATGGCCGTGTGGATCTTCGCTGCGATCAACAGGAGAGACCTTTATGAGAAAGCAAAAAGAGATGAGCCGAAGTGGGGTTCAGATAATGCACGTGTTTCGAATCCCACTGTGATATGCCAGGAAGACAGCATTGAAGAGGAGTGGATGGGTTTACTGGAGTACCTTTCGAGAATCTCTATTTGTAAAATGAAGAAAGATTACCGTAAGAAGTACAGAAAGTACGTGAGAAGCAGATTCCAGTGCATTGAAGACAGGAATGCCCGTCTGGGTGAGAGTGTGAGCCTCAACAAACGCTACACACGACTGCGTCTCATCAAGGAGCACCGGAGCCAGCAGGAGAGGGAGCAGGAGCTTCTGGCCATCGGCAAGACCAAGACGTGTGAGAGCCCCGTGAGTCCCATTAAGATGGAGTTGCTGTTTGACCCCGATGATGAGCATTCTGAGCCTGTGCACACCGTGGTGTTCCAGGGGGCGGCAGGGATTGGGAAAACAATCCTGGCCAGGAAGATGATGTTGGACTGGGCGTCGGGGACACTCTACCAAGACAGGTTTGACTATCTGTTCTATATCCACTGTTGGGAGGTGAGCCTTGTGACACAGAGGAGCCTGGGGGACCTGATCATGAGCTGCTGCCCCGACCCAAACCCACCCATCCACAAGATCGTGAGAAAACCCTCCAGAATCCTCTTCCTCATGGACGGCTTCGATGAGCTGCAAGGTGCCTTTGACGAGCACATAGGACCGCTCTGCACTGACTGGCAGAAGGCCGAGCGGGGAGACATTCTCCTGAGCAGCCTCATCAGAAAGAAGCTGCTTCCCGAGGCCTCTCTGCTCATCACCACGAGACCTGTGGCCCTGGAGAAACTGCAGCACTTGCTGGACCATCCTCGGCATGTGGAGATCCTGGGTTTCTCCGAGGCCAAAAGGAAAGAGTACTTCTTCAAGTACTTCTCTGATGAGGCCCAAGCCAGGGCAGCCTTCAGTCTGATTCAGGAGAACGAGGTCCTCTTCACCATGTGCTTCATCCCCCTGGTCTGCTGGATCGTGTGCACTGGACTGAAACAGCAGATGGAGAGTGGCAAGAGCCTTGCCCAGACATCCAAGACCACCACCGCGGTGTACGTCTTCTTCCTTTCCAGTTTGCTGCAGCCCCGGGGAGGGAGCCAGGAGCACGGCCTCTGCGCCCACCTCTGGGGGCTCTGCTCTTTGGCTGCAGATGGAATCTGGAACCAGAAAATCCTGTTTGAGGAGTCCGACCTCAGGAATCATGGACTGCAGAAGGCGGATGTGTCTGCTTTCCTGAGGATGAACCTGTTCCAAAAGGAAGTGGACTGCGAGAAGTTCTACAGCTTCATCCACATGACTTTCCAGGAGTTCTTTGCCGCCATGTACTACCTGCTGGAAGAGGAAAAGGAAGGAAGGACGAACGTTCCAGGGAGTCGTTTGAAGCTTCCCAGCCGAGACGTGACAGTCCTTCTGGAAAACTATGGCAAATTCGAAAAGGGGTATTTGATTTTTGTTGTACGTTTCCTCTTTGGCCTGGTAAACCAGGAGAGGACCTCCTACTTGGAGAAGAAATTAAGTTGCAAGATCTCTCAGCAAATCAGGCTGGAGCTGCTGAAATGGATTGAAGTGAAAGCCAAAGCTAAAAAGCTGCAGATCCAGCCCAGCCAGCTGGAATTGTTCTACTGTTTGTACGAGATGCAGGAGGAGGACTTCGTGCAAAGGGCCATGGACTATTTCCCCAAGATTGAGATCAATCTCTCCACCAGAATGGACCACATGGTTTCTTCCTTTTGCATTGAGAACTGTCATCGGGTGGAGTCACTGTCCCTGGGGTTTCTCCATAACATGCCCAAGGAGGAAGAGGAGGAGGAAAAGGAAGGCCGACACCTTGATATGGTGCAGTGTGTCCTCCCAAGCTCCTCTCATGCTGCCTGTTCTCATGGATTGGTGAACAGCCACCTCACTTCCAGTTTTTGCCGGGGCCTCTTTTCAGTTCTGAGCACCAGCCAGAGTCTAACTGAATTGGACCTCAGTGACAATTCTCTGGGGGACCCAGGGATGAGAGTGTTGTGTGAAACGCTCCAGCATCCTGGCTGTAACATTCGGAGATTGTGGTTGGGGCGCTGTGGCCTCTCGCATGAGTGCTGCTTCGACATCTCCTTGGTCCTCAGCAGCAACCAGAAGCTGGTGGAGCTGGACCTGAGTGACAACGCCCTCGGTGACTTCGGAATCAGACTTCTGTGTGTGGGACTGAAGCACCTGTTGTGCAATCTGAAGAAGCTCTGGTTGGTCAGCTGCTGCCTCACATCAGCATGTTGTCAGGATCTTGCATCAGTATTGAGCACCAGCCATTCCCTGACCAGACTCTATGTGGGGGAGAATGCCTTGGGAGACTCAGGAGTCGCAATTTTATGTGAAAAAGCCAAGAATCCACAGTGTAACCTGCAGAAACTGGGGTTGGTGAATTCTGGCCTTACGTCAGTCTGTTGTTCAGCTTTGTCCTC
GGTACTCAGCACTAATCAGAATCTCACGCACCTTTACCTGCGAGGCAACACTCTCGGAGACAAGGGGATCAAACTACTCTGTGAGGGACTCTTGCACCCCGACTGCAAGCTTCAGGTGTTGGAATTAGACAACTGCAACCTCACGTCACACTGCTGCTGGGATCTTTCCACACTTCTGACCTCCAGCCAGAGCCTGCGAAAGCTGAGCCTGGGCAACAATGACCTGGGCGACCTGGGGGTCATGATGTTCTGTGAAGTGCTGAAACAGCAGAGCTGCCTCCTGCAGAACCTGGGGTTGTCTGAAATGTATTTCAATTATGAGACAAAAAGTGCGTTAGAAACACTTCAAGAAGAAAAGCCTGAGCTGACCGTCGTCTTTGAGCCTTCTTGGTAGTAG
End with: GGATCC

**Supplementary Figure 1. Cloning of CASP1-T2A-NLRP3-R260W into Lentiviral plasmid CD514B-1 (NEO).**

ASC Gene Synthesis vector : pUC57

Add 5’ EcoRV site and 3’ DraI site for cloning into pLenti-Puro plasmid

gccacc**ATG**GAACAGAAACTCATCTCTGAAGAGGATCTGTCTAGAGGATCCGAATTCGATCCTGGAGCCATGGGGCGCGCGCGCGACGCCATCCTGGATGCGCTGGAGAACCTGACCGCCGAGGAGCTCAAGAAGTTCAAGCTGAAGCTGCTGTCGGTGCCGCTGCGCGAGGGCTACGGGCGCATCCCGCGGGGCGCGCTGCTGTCCATGGACGCCTTGGACCTCACCGACAAGCTGGTCAGCTTCTACCTGGAGACCTACGGCGCCGAGCTCACCGCTAACGTGCTGCGCGACATGGGCCTGCAGGAGATGGCCGGGCAGCTGCAGGCGGCCACGCACCAGGGCTCTGGAGCCGCGCCAGCTGGGATCCAGGCCCCTCCTCAGTCGGCAGCCAAGCCAGGCCTGCACTTTATAGACCAGCACCGGGCTGCGCTTATCGCGAGGGTCACAAACGTTGAGTGGCTGCTGGATGCTCTGTACGGGAAGGTCCTGACGGATGAGCAGTACCAGGCAGTGCGGGCCGAGCCCACCAACCCAAGCAAGATGCGGAAGCTCTTCAGTTTCACACCAGCCTGGAACTGGACCTGCAAGGACTTGCTCCTCCAGGCCCTAAGGGAGTCCCAGTCCTACCTGGTGGAGGACCTGGAGCGGAGC**TGATGA**

Underline: KOZAK

**Supplementary Figure 2. My-ASC with optimal KOZAK sequence.** Start and stop codons are indicated in bold red font.


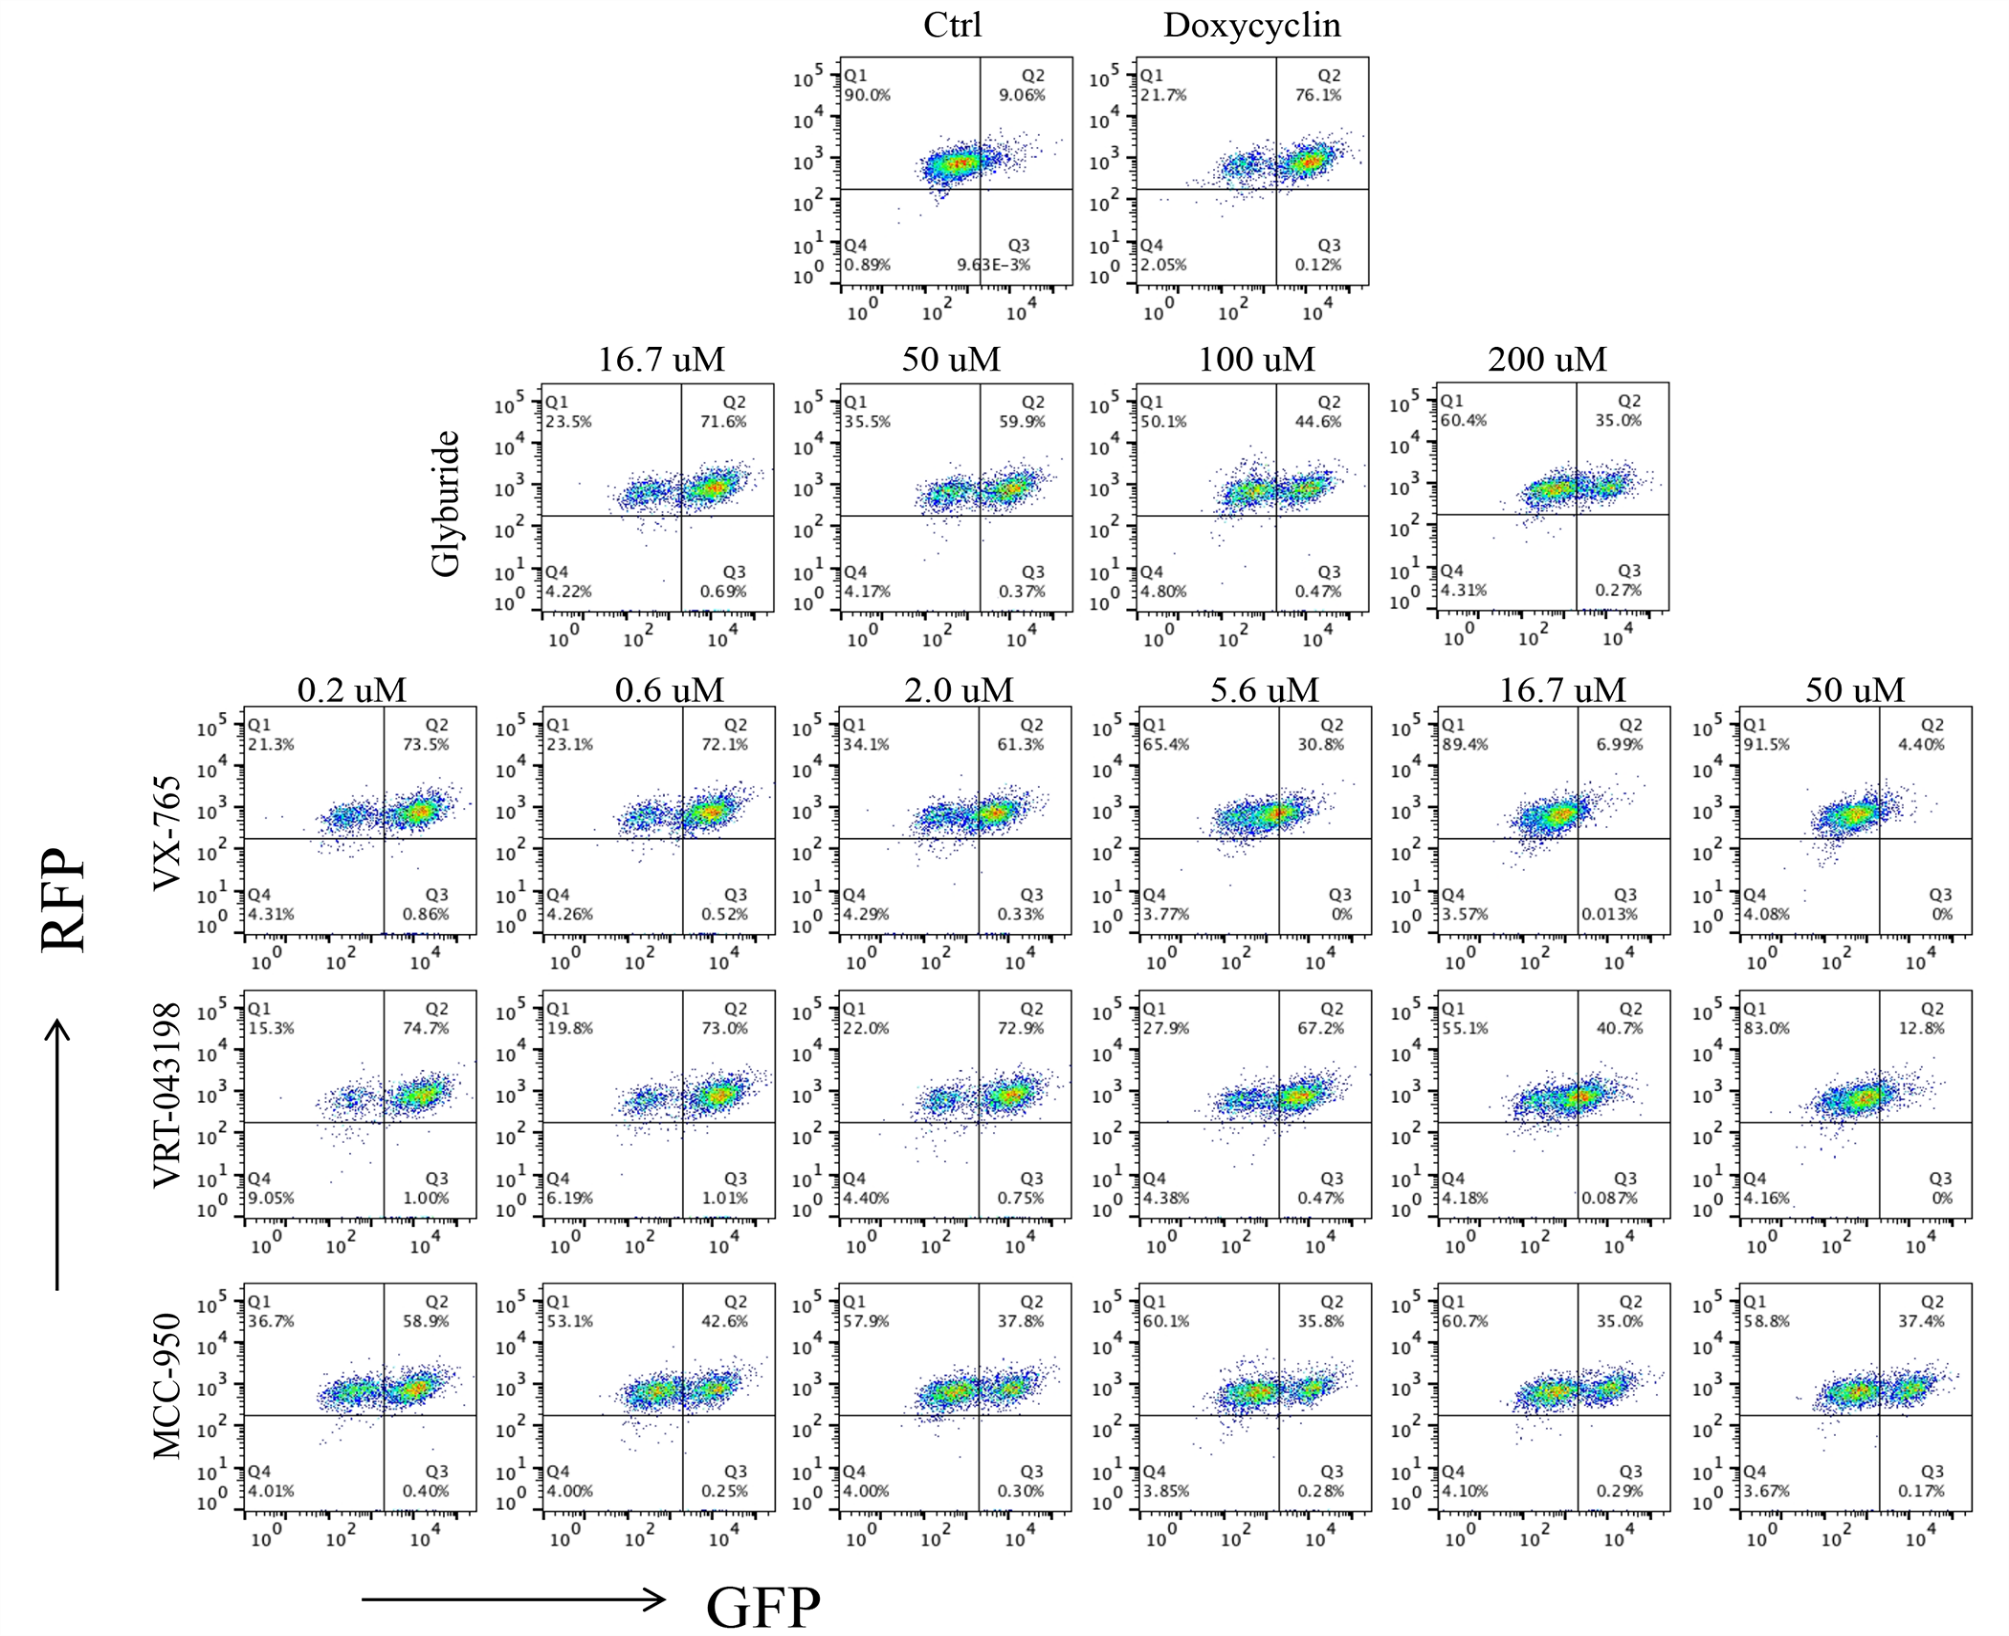


**Supplementary Figure 3. Effect of representative inhibitors of NLRP3 inflammasome on the fluorescent intensity in HEK293-NLRP3/CASP1-iASC-*CASP*orter.** The Dox-induced activation of NLRP3 inflammasome was dose-dependently inhibited by co-treatment with four reported inhibitors (MCC950, Glyburide, VX-765, VRT-043198).


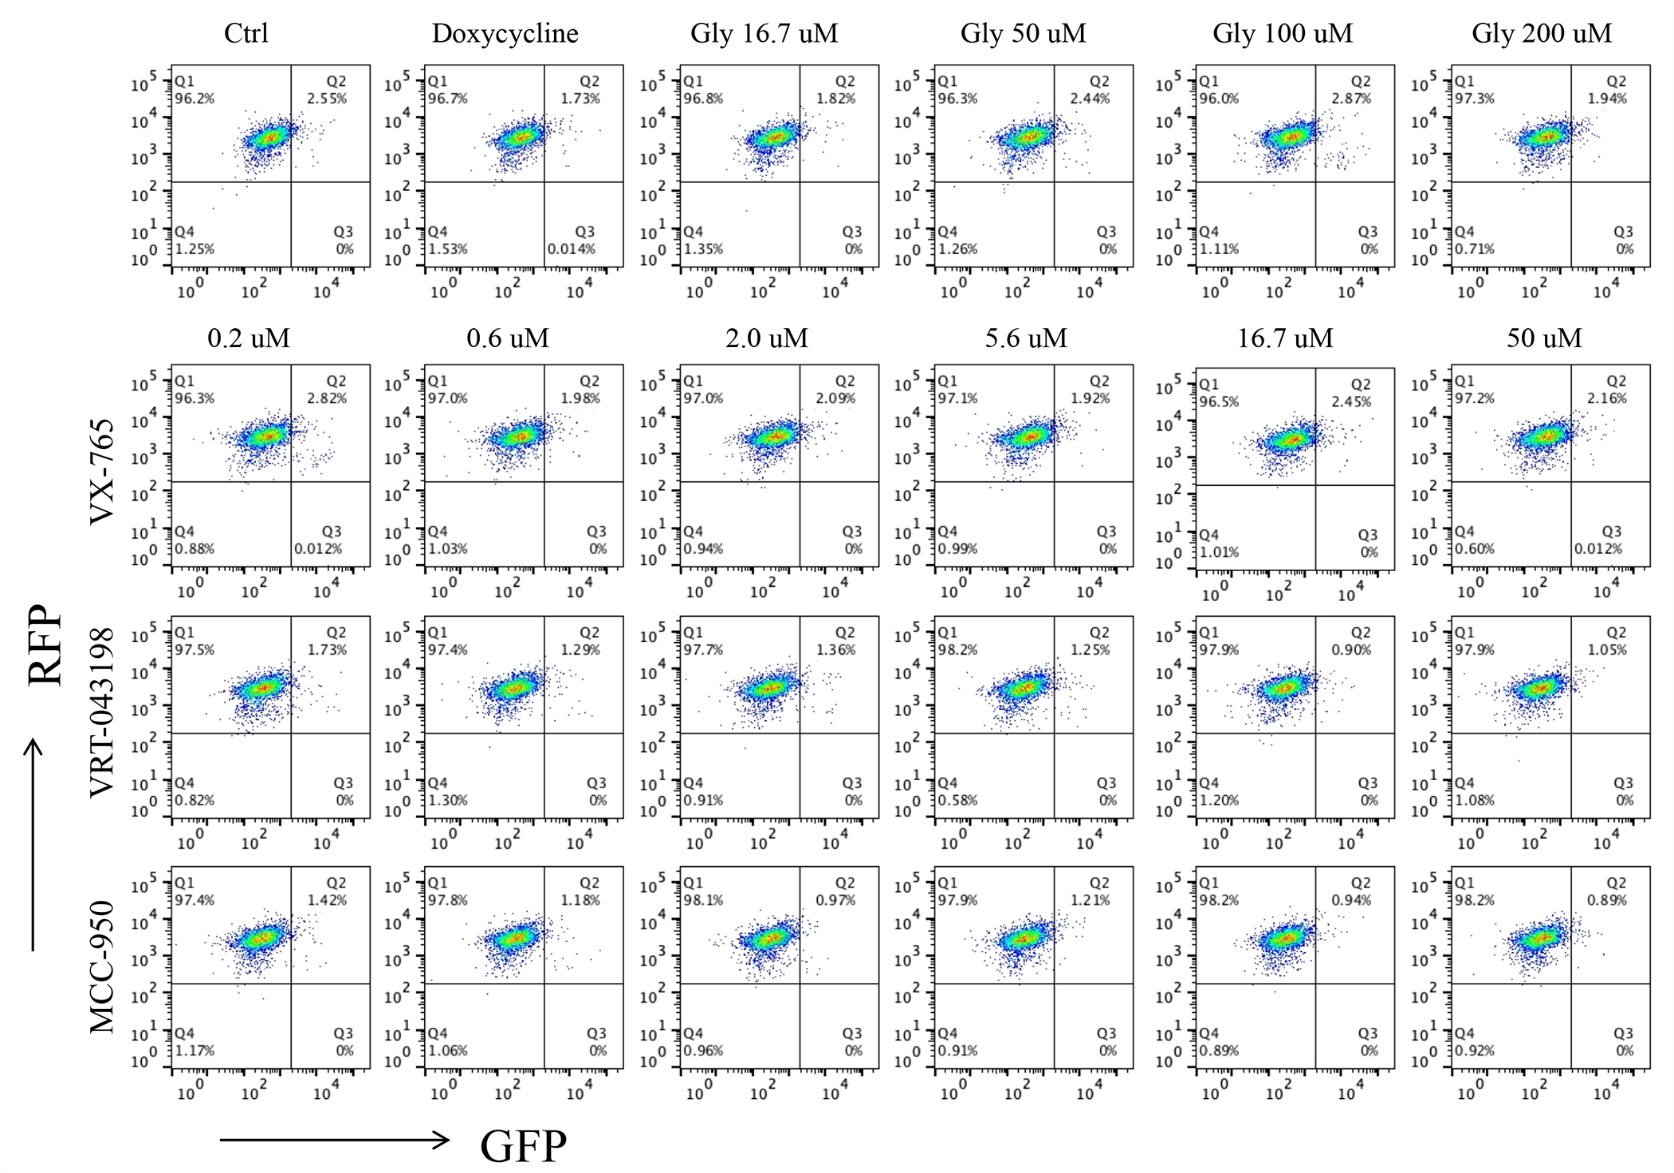


**Supplementary Figure 4. Effect of representative inhibitors of NLRP3 inflammasome on the fluorescent intensity in HEK293-NLRP3/CASP1-iLacZ-*CASP*orter.** The Dox-induced activation of NLRP3 inflammasome was not affected by co-treatment with four reported inhibitors (MCC950, Glyburide, VX-765, VRT-043198) in HEK293-NLRP3/CASP1-iLacZ-*CASP*orter cells.


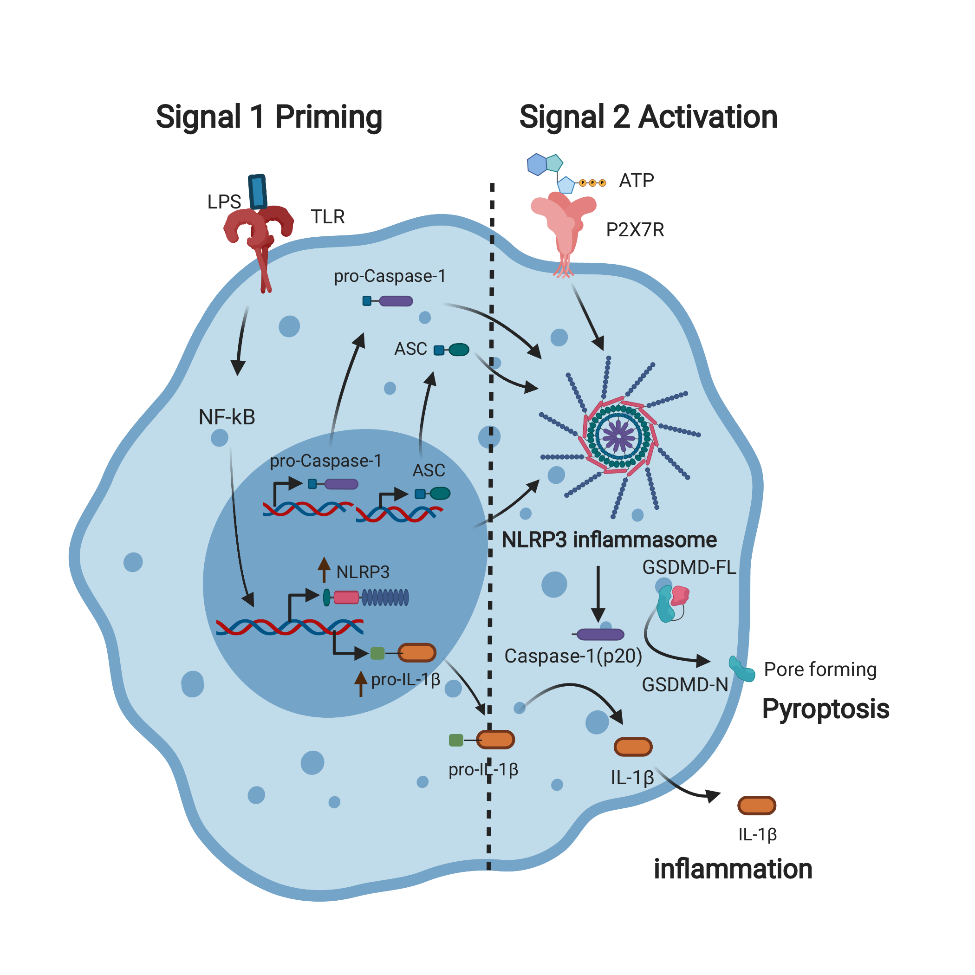


**Supplementary Figure 5** **Schematic illustration of the NLRP3 inflammasome activation.** The NLRP3 inflammasome can be activated by two signals. Firstly, signal 1, or priming signal, e.g. LPS (left) ligates to the toll-like receptors (TLRs) in the plasma membrane, stimulates the activation of NF-κB signaling pathway, which contribute to a massive increase expression of both NLRP3 and pro-IL-1β. Subsequently, upon expourse to signal 2, e.g. ATP (right), ATP binding to a ligand-gated acid sensing ion channel receptor called P2X7R, triggers assembly of the NLRP3 inflammasome, activation of the NLRP3 inflammasome cleaves pro-caspase-1 to the bioactive form (caspase-1 p20), which is essential for the cleavage of pro-IL-1β into its mature form IL-1β, IL-1β is then rapidly secreted from the cell. Additionally, active caspase-1 also cleaves Gasdermin D (FL-GSDMD) into N-terminal fragment (N-GSDMD) that would induce pore formation in the plasma membrane and finally lead to pyroptosis.


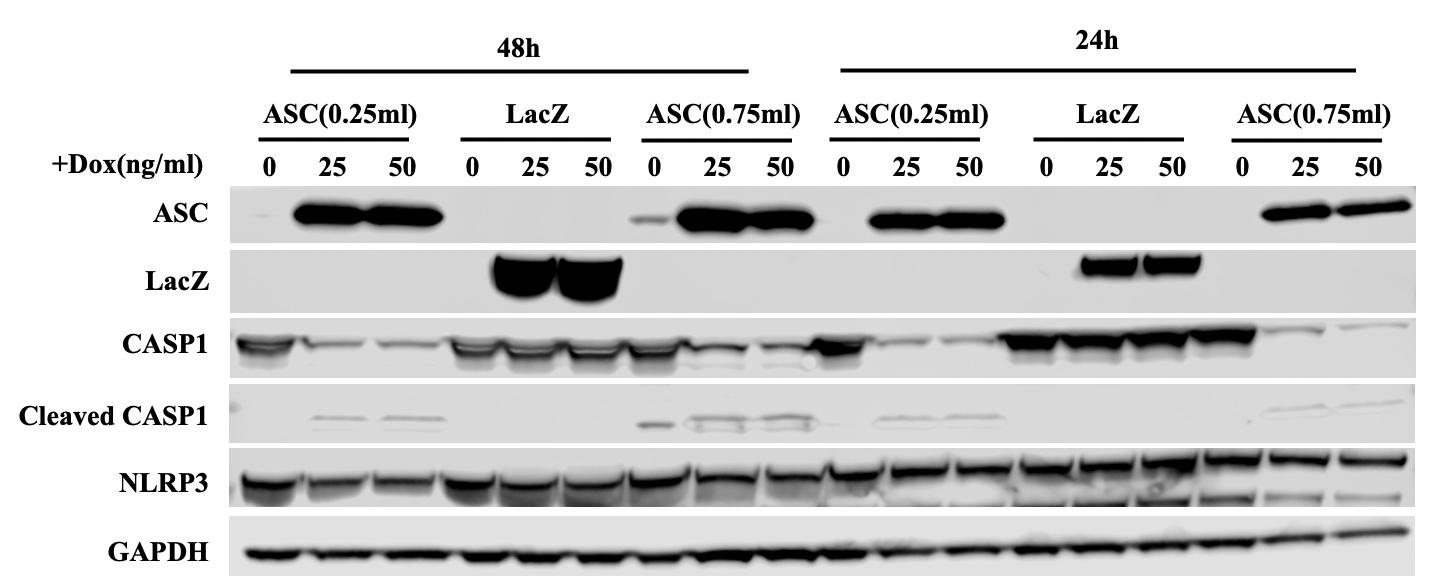


**Supplementary Figure 6** The time course (0, 24, 48h) and concentration course(0, 25, 50 ng/mL) of doxycycline-induced ASC activity. 25 ng/mL Dox treated for >24 h induces abundant ASC expression and follow-up cleaved caspase-1 formation. Since longer time(48h) and higher concentration did not enhance ASC protein expression to a great extent, taking into account the easy operation, we chosen 24h for the follow-up experiments.


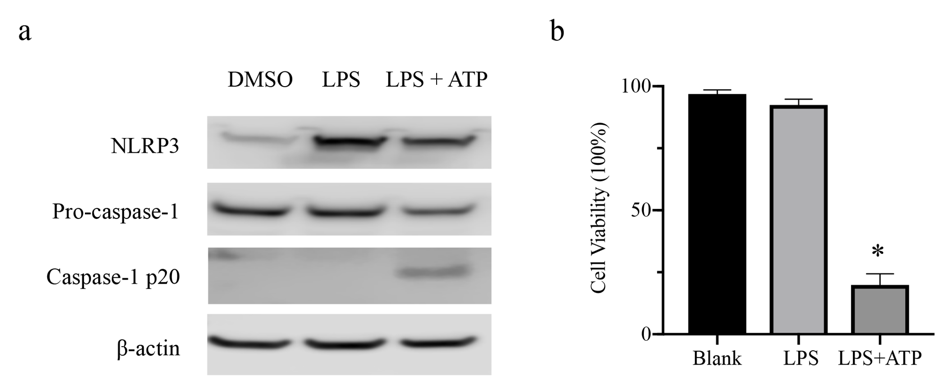


**Supplementary Figure 7** NLRP3 inflammasome activation and ~80% cells dead after LPS/ATP treatment in THP-1 cells. a. Western Blot analyses the expression of inflammasome components NLRP3 and pro- and cleaved-Caspase-1 upon inflammasome formation and activation through 3h LPS+ 1h ATP treatment. b. The viability ofTHP1 cell was assessed by trypan blue after treatment with or without LPS/ATP. *P<0.05.

**Supplementary Table 1 Summary of four reported NLRP3 inhibitors**

| **Drug** | **Host** | **IC50/IL-1β inhibition** | **Target** | **Status** |
| --- | --- | --- | --- | --- |
| Glyburide | C57BL/6，BMDMs | ～10 μM in BMDMs | NA | Approved |
| MCC950 | C57BL6/BMDMs | 7.5 nM in BMDMs, 8.1 nM in HMDMs | NLRP3 | Phase II |
| VX-765 | C57BL6J/BMDMs/ astrocyte | ~0.7 uM in human PBMCs | caspase-1 | Phase II |
| VRT-043198 | C57BL6J/BMDMs | Ki 0.8 nM, 1.9 μM in human PBMCs | caspase-1 | - |
